# Supplementary material
Source: PubMed Central journal article supplement (PMC4236266)
Supplement: NIHMS625001-supplement-Supp_Material.pdf [file NIHMS625001-supplement-Supp_Material.pdf]

**Functional Mixed Effects Models for Imaging  
Genetic Data : Supplementary Document**

This supplementary document include Stage II, proof of Theorem 1, wild bootstrap procedure, and detailed information of simulation setting and real data analysis for reader's reference. It includes the descriptive statistics of signal-to-noise ratio (SNR), names and corresponding MAFs of SNPs, demographic information of the selected genes PICALM, CR1, and CD2AP and names and sizes in number of voxels of detected brain regions for 3 selected genes.

## Stage II

Similar to Stage I, the key idea of AET is to build a sequence of  $L(\boldsymbol{\beta}(v)|\mathbf{Y}, B(v, h))$  for  $h_0 = 0 < h_1 < \dots < h_S = r_0$  at each voxel  $v \in \mathcal{V}$  and then sequentially determine adaptive weights  $\omega_\beta(v, v'; h_s)$  for all  $v' \in B(v, h_s)$  based on  $\{\hat{\boldsymbol{\beta}}(v', h_{s-1}) : v' \in B(v, h_s)\}$  for all  $v \in \mathcal{V}$  and  $s = 1, \dots, S$ . A path diagram of AET for  $\boldsymbol{\beta}(v)$  is given as follows:

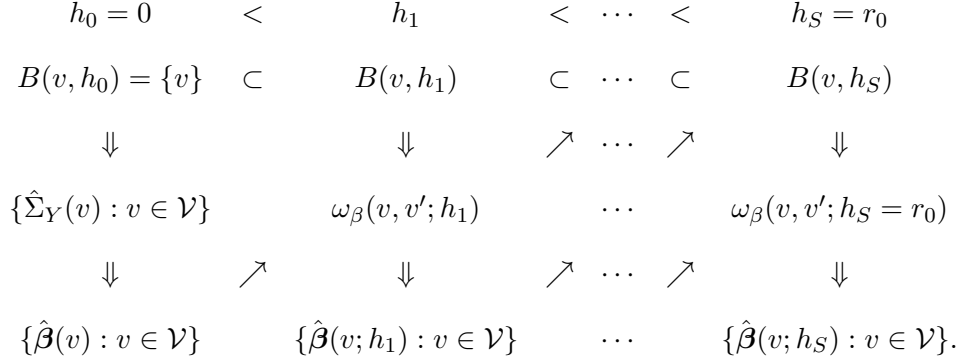

Since many key tuning parameters in this AET procedure are similar to those used in Stage I, we just highlight several key differences as follows.

To estimate  $\boldsymbol{\beta}(v)$  at voxel  $v$ , we utilize all the data  $\{\mathbf{Y}(v') : v' \in B(v, h)\}$  to construct the weighted log-likelihood function for a voxel  $v$  at scale  $h$ , which is given by

$$\ell_{obs}(\boldsymbol{\beta}(v); h) = -0.5 \sum_{i=1}^n \sum_{v' \in B(v, h)} \omega_\beta(v, v'; h) \{\mathbf{Y}(v') - \mathbf{X}\boldsymbol{\beta}(v)\}^T \hat{\Sigma}_Y(v')^{-1} \{\mathbf{Y}(v') - \mathbf{X}\boldsymbol{\beta}(v)\}. \tag{1}$$

By directly maximizing  $\ell_{obs}(\boldsymbol{\beta}(v); h)$ , we can obtain the maximum weighted likelihood estimate of  $\boldsymbol{\beta}(v)$ , denoted by  $\hat{\boldsymbol{\beta}}(v; h)$ , which is given by

$$\{\Sigma_{n,1}(v; h)\}^{-1} \mathbf{X}^T \sum_{v' \in B(v, h)} \omega_{\beta}(v, v'; h) \{\hat{\Sigma}_Y(v')\}^{-1} \mathbf{Y}(v'), \quad (2)$$

where  $\Sigma_{n,1}(v; h) = \sum_{v' \in B(v, h)} \omega_{\beta}(v, v'; h) \mathbf{X}^T \{\hat{\Sigma}_Y(v')\}^{-1} \mathbf{X}$ . The covariance matrix of  $\hat{\boldsymbol{\beta}}(v; h)$  can be approximated by

$$\text{Cov}(\hat{\boldsymbol{\beta}}(v; h)) \approx \Sigma_n(\hat{\boldsymbol{\beta}}(v; h)) = \{\Sigma_{n,1}(v; h)\}^{-1} \mathbf{X}^T \Sigma_{n,2}(v; h) \mathbf{X} \{\Sigma_{n,1}(v; h)\}^{-1}, \quad (3)$$

where  $\Sigma_{n,2}(v; h)$  is given by

$$\sum_{v', v'' \in B(v, h)} \omega_{\beta}(v, v'; h) \omega_{\beta}(v, v''; h) \hat{\Sigma}_Y(v')^{-1} \{\mathbf{Y}(v') - \mathbf{X} \hat{\boldsymbol{\beta}}(v')\} \{\mathbf{Y}(v'') - \mathbf{X} \hat{\boldsymbol{\beta}}(v'')\}^T \hat{\Sigma}_Y(v'')^{-1}.$$

The adaptive weights are given by

$$\omega_{\beta}(v, v'; h) = K_{loc}(\|v - v'\|_2/h) K_{st}(D_{\beta}(v, v'; h)/C_n), \quad (4)$$

where  $D_{\beta}(v, v'; h_{s-1})$  is set as

$$\{\hat{\boldsymbol{\beta}}(v; h_{s-1}) - \hat{\boldsymbol{\beta}}(v'; h_{s-1})\}^T \{\text{Cov}(\hat{\boldsymbol{\beta}}(v))\}^{-1} \{\hat{\boldsymbol{\beta}}(v; h_{s-1}) - \hat{\boldsymbol{\beta}}(v'; h_{s-1})\}. \quad (5)$$

Based on  $\hat{\boldsymbol{\beta}}(v; h)$ , we can further construct test statistics to examine scientific questions regarding  $\boldsymbol{\beta}(v)$ . These questions can be formulated as linear hypotheses about  $\boldsymbol{\beta}(v)$ ,

$$H_{0,\mu} : R_1 \boldsymbol{\beta}(v) = \mathbf{b}_0 \quad \text{vs.} \quad H_{1,\mu} : R_1 \boldsymbol{\beta}(v) \neq \mathbf{b}_0, \quad (6)$$

where  $\mu = R_1 \boldsymbol{\beta}(v)$ ,  $R_1$  is a  $r \times k$  matrix of full row rank and  $\mathbf{b}_0$  is a  $r \times 1$  specified vector.

We test the null hypothesis  $H_{0,\mu} : R_1 \boldsymbol{\beta}(v) = \mathbf{b}_0$  using the Wald test statistic

$$W_{\mu}(v; h) = \{R_1 \hat{\boldsymbol{\beta}}(v; h) - \mathbf{b}_0\}^T \{R_1 \Sigma_n(\hat{\boldsymbol{\beta}}(v; h)) R_1^T\}^{-1} \{R_1 \hat{\boldsymbol{\beta}}(v; h) - \mathbf{b}_0\}. \quad (7)$$

Under  $H_{0,\mu}$ ,  $W_{\mu}(v; h)$  is asymptotically distributed as  $\chi^2(r)$  (?).

## Proof of Theorem 1

It is shown that the REML estimation of covariance is invariant to the choice of  $K_x$  (Searle et al, 1992, Ch.6). Without loss of generality, we may assume  $K_x K_x^T = \mathbf{I}_{n-p}$ , where  $\mathbf{I}_{n-p}$  is an  $(n-p) \times (n-p)$  identity matrix. Also, since the matrix  $K_x \mathbf{Z}^T \mathbf{I}_L \mathbf{Z} K_x^T = \Omega$  is positive semidefinite, there exists an  $(n-p) \times (n-p)$  orthogonal matrix  $U$  and a diagonal matrix  $D_0 = \text{diag}\{d_1, \dots, d_{n-p}\}$  such that  $\Omega = U D_0 U^T$ , where the columns of  $U$  are the eigenvectors of  $\Omega$  and  $d_i, i = 1, \dots, n-p$  are the corresponding eigenvalues. Under the null hypothesis  $\sigma_\gamma^2(v) = 0$ ,  $\mathbf{Y}^*(v')$  is distributed as  $N(0, \sigma_e^2(v') \mathbf{I}_{n-p})$ . Therefore, we have the following results:

- $\sigma_e(v')^{-1} U^T \mathbf{Y}^*(v') \stackrel{d}{\sim} N(\mathbf{0}_{n-p}, \mathbf{I}_{n-p})$  and  $\frac{1}{\sigma_e(v') \sqrt{1 + \lambda(v') d_i}} u_i^T \mathbf{Y}^*(v') \stackrel{d}{\sim} N(0, \frac{1}{1 + \lambda(v') d_i})$ , where  $u_i$  is the  $i$ th eigenvector of  $\Omega$ . Also,

$$\frac{1}{\sigma_e(v')} \{\mathbf{I}_{n-p} + \lambda(v') D_0\}^{-\frac{1}{2}} U^T \mathbf{Y}^*(v') \stackrel{d}{\sim} N(\mathbf{0}_{n-p}, [\mathbf{I}_{n-p} + \lambda(v') D_0]^{-1}). \quad (8)$$

- The determinant of  $\sigma_e^2(v') \{\mathbf{I}_{n-p} + \lambda(v') \Omega\}$  equals  $\sigma_e(v')^{2(n-p)} \prod_{i=1}^{n-p} \{1 + \lambda(v') d_i\}$ .
- Since the actual dimension of  $\Omega$  is at most  $L$ , we have  $d_i = 0$  for  $i = L + 1, \dots, n-p$ .

Then,  $\ell_{REML}(\mathbf{Y}^*(v') \mid \mathbf{Z}, \sigma_e^2(v'), \sigma_\gamma^2(v) \geq 0) - \ell_{REML}(\mathbf{Y}^*(v') \mid \mathbf{Z}, \sigma_e^2(v'), \sigma_\gamma^2(v) = 0)$  can be approximated by

$$\begin{aligned} & \frac{1}{2\sigma_e^2(v')} (\mathbf{Y}^*(v')^T \mathbf{Y}^*(v') - \mathbf{Y}^*(v')^T \{U[\mathbf{I}_{n-p} + \lambda(v') \Omega] U^T\}^{-1} \mathbf{Y}^*(v')) - \frac{1}{2} \sum_{i=1}^L \log(1 + \lambda(v') d_i) \\ & \stackrel{\mathcal{D}}{=} \frac{1}{2} \left\{ \sum_{i=1}^{n-p} z_i^2(v') - \sum_{i=1}^L \log(1 + \lambda(v') d_i) - \sum_{i=1}^{n-p} \frac{z_i^2(v')}{1 + \lambda(v') d_i} \right\} \\ & \stackrel{\mathcal{D}}{=} \frac{1}{2} \left\{ \sum_{i=1}^L \frac{z_i^2(v') \lambda(v') d_i}{1 + \lambda(v') d_i} - \sum_{i=1}^L \log(1 + \lambda(v') d_i) \right\} = \frac{1}{2} D(v'), \end{aligned} \quad (9)$$

where the  $z_i(v')$ 's are mutually independent for all  $i = 1, \dots, n - p$  and normally distributed with mean 0 and variance 1. Finally, we have

$$\begin{aligned}
\text{RLRT}_n(v) &= 2 \sup_{\sigma_\gamma^2(v) \geq 0} \{L_{REML}(\sigma_\gamma^2(v) \mid \mathbf{Y}^*, B(v, h)) - L_{REML}(0 \mid \mathbf{Y}^*, B(v, h))\} \\
&= 2 \sup_{\sigma_\gamma^2(v) \geq 0} \sum_{v' \in B(v, h)} \omega(v, v', h) \{ \ell_{REML}(\mathbf{Y}^*(v') \mid \mathbf{Z}, \hat{\sigma}_e^2(v'), \sigma_\gamma^2(v) > 0) \\
&\quad - \ell_{REML}(\mathbf{Y}^*(v') \mid \mathbf{Z}, \hat{\sigma}_e^2(v'), \sigma_\gamma^2(v) = 0) \} \\
&\stackrel{\mathcal{D}}{=} \sup_{\sigma_\gamma^2(v) \geq 0} \{ \sum_{v' \in B(v, h)} \omega(v, v', h) D(v') \}.
\end{aligned} \tag{10}$$

### Wild Bootstrap Procedure

Let  $\Sigma_{Y^*}(v) = \sigma_\gamma^2(v)\Omega + \sigma_e^2(v)\mathbf{I}_{n-p}$  and transform  $\mathbf{Y}^*(v)$  into  $\tilde{\mathbf{Y}}^*(v) = U^T \Sigma_{Y^*}(v)^{-1/2} \mathbf{Y}^*(v)$  such that  $\tilde{\mathbf{Y}}^*(v) \sim N(\mathbf{0}, \mathbf{I}_{n-p})$ . It follows from  $\Omega = UD_0U^T$  that

$$\tilde{\mathbf{Y}}^*(v) = (\tilde{y}_1(v), \dots, \tilde{y}_{n-p}(v))^T = \{\sigma_e^2(v)\mathbf{I}_{n-p} + \sigma_\gamma^2(v)D\}^{-1/2} U^T \mathbf{Y}^*(v). \tag{11}$$

We develop a wild bootstrap procedure as follows.

- Step 1. Define a grid  $0 = \lambda_1(v) < \lambda_2(v) < \dots < \lambda_M(v)$  of  $M$  possible values for  $\lambda(v)$ .
- Step 2. Generate  $\xi_l^{(s)}$  independently from  $N(0, 1)$  for  $l = 1, \dots, n - p$ .
- Step 3. For every grid point  $\lambda_m(v)$ , calculate an approximation of  $D(v'; \lambda_m(v)/\hat{\sigma}_e^2(v))$  as follows:

$$\begin{aligned}
\hat{D}^{(s)}(v'; \lambda_m(v)/\hat{\sigma}_e^2(v)) &= \sum_{l=1}^{n-p} \frac{\xi_l^{(s)} \{\tilde{y}_l^2(v') - 1\} d_l \lambda_m(v)/\hat{\sigma}_e^2(v') + d_l \lambda_m(v)/\hat{\sigma}_e^2(v')}{1 + d_l \lambda_m(v)/\hat{\sigma}_e^2(v')} \\
&\quad - \sum_{l=1}^{n-p} \log(1 + d_l \lambda_m(v)/\hat{\sigma}_e^2(v')).
\end{aligned} \tag{12}$$

Since the samples are generated independently among voxels which does not take the spatial correlation of the imaging measurements into consideration, the samples in

(12) are generated from the original imaging data instead in order to address this limitation.

- Step 4. Calculate

$$\text{RLRT}_n^{(s)}(v) = \sup_{1 \leq m \leq M} \left\{ \sum_{v' \in B(v, h)} \omega(v, v'; h) \widehat{D}^{(s)}(v'; \lambda_m(v) / \hat{\sigma}_e^2(v')) \right\}. \quad (13)$$

- Step 5. Repeat Steps 1-5 for  $S$  iterations.
- Step 6. Approximate the  $p$ -value of  $\text{RLRT}_n(v)$  based on an approximation given by

$$\text{RLRT}_n(v) \stackrel{D}{\approx} a_0 u_0 d_0, \quad (14)$$

where  $u_0 \sim \text{Bernoulli}(1 - p_0)$ ,  $d_0 \sim \chi_1^2$  are independent random variables,  $p_0 = P(u_0 = 0)$  and  $a_0$  are unknown constants, and  $\stackrel{D}{\approx}$  denotes approximate equality in distribution. Considering computational efficiency, instead of generating many bootstrap samples, we estimate the parameters  $a_0$  and  $p_0$  in the approximation (14) as follows:

$$\hat{a}_0 = \sum_{v' \in B(v, h^S)} \omega(v, v'; h^S) \tilde{a}_0, \quad \hat{p}_0 = \sum_{v' \in B(v, h^S)} \omega(v, v'; h^S) \tilde{p}_0, \quad (15)$$

where

$$\tilde{p}_0 = 1 - 3 \frac{\{\sum_{s=1}^S \text{RLRT}_n^{(s)}(v)\}^2}{S \sum_{s=1}^S \text{RLRT}_n^{(s)}(v)^2} \quad \text{and} \quad \tilde{a}_0 = \frac{\sum_{s=1}^S \text{RLRT}_n^{(s)}(v)}{S(1 - \hat{p})}. \quad (16)$$

Computationally, the above algorithm is quite efficient. First, we only need to compute  $\tilde{\mathbf{Y}}^*(v)$  once for all voxels. Second,  $\Omega$  is fixed and thus it is straightforward to compute its eigenvalues and eigenfunctions. Third, all  $\hat{\sigma}_e^2(v)$  are calculated once at Step I.1. Fourth, to choose grid points of  $\lambda(v)$ , we set  $M = 50$  and  $\lambda_M(v) = 3 \max_{v' \in \mathcal{V}} \hat{\sigma}_\gamma^2(v')$ .

## Simulation Results

Table 1: Simulation setting: descriptive statistics of **SNRs** for 10 regions of  $\sigma_\gamma^2(v)$  from a simulated data set of *Scenario I*, in which the SNPs are extracted from the chromosome 1 in ADNI.

| $\sigma_\gamma^2(v)$ | Number of voxels | Mean  | Standard Deviation | Min   | Max   |
|----------------------|------------------|-------|--------------------|-------|-------|
| 0                    | 4749             | 0.124 | 0.062              | 0.024 | 0.412 |
| 0.0050               | 207              | 0.819 | 0.572              | 0.003 | 2.745 |
| 0.0075               | 135              | 1.010 | 0.774              | 0.006 | 3.340 |
| 0.0100               | 111              | 1.123 | 0.815              | 0.021 | 3.714 |
| 0.0125               | 147              | 1.270 | 1.014              | 0.043 | 4.303 |
| 0.0150               | 75               | 1.262 | 1.026              | 0.025 | 4.074 |
| 0.0175               | 48               | 1.334 | 1.150              | 0.034 | 5.930 |
| 0.0200               | 144              | 1.436 | 1.060              | 0.019 | 3.940 |
| 0.0225               | 111              | 1.687 | 1.191              | 0.036 | 4.886 |
| 0.0250               | 81               | 1.877 | 1.366              | 0.020 | 6.674 |

Table 2: Simulation setting: descriptive statistics of **SNRs** for 10 regions of  $\sigma_\gamma^2(v)$  from a simulated data set of *Scenario II*, in which the SNPs are extracted from the gene PICALM in ADNI.

| $\sigma_\gamma^2(v)$ | Number of voxels | Mean  | Standard Deviation | Min    | Max   |
|----------------------|------------------|-------|--------------------|--------|-------|
| 0                    | 4749             | 0.111 | 0.055              | 0.022  | 0.357 |
| 0.005                | 207              | 0.189 | 0.136              | 0.001  | 0.699 |
| 0.010                | 135              | 0.234 | 0.188              | 0.001  | 0.854 |
| 0.015                | 111              | 0.301 | 0.246              | 0.003  | 1.092 |
| 0.020                | 147              | 0.349 | 0.274              | 0.003  | 1.307 |
| 0.025                | 75               | 0.337 | 0.282              | 0.004  | 1.111 |
| 0.030                | 48               | 0.365 | 0.257              | 0.0005 | 0.996 |
| 0.035                | 144              | 0.424 | 0.283              | 0.003  | 1.324 |
| 0.040                | 111              | 0.491 | 0.443              | 0.010  | 1.008 |
| 0.045                | 81               | 0.500 | 0.403              | 0.034  | 1.909 |



Table 3: ADNI data analysis: the minor allele frequency (MAF) in % of selected SNPs on PICALM, CR1, and CD2AP

| <b>PICALM</b> |      |            |      |              |      |            |      |
|---------------|------|------------|------|--------------|------|------------|------|
| rs618679      | 22.1 | rs2077815  | 22.6 | rs666692     | 48.9 | rs527162   | 22.1 |
| rs10898427    | 21.2 | rs11234495 | 24.8 | rs664629     | 37.0 | rs680119   | 40.7 |
| rs510566      | 22.9 | rs10501602 | 8.8  | rs1774523    | 19.4 | rs10501608 | 17.2 |
| rs10501604    | 17.4 | rs713346   | 25.2 | rs1941375    | 27.3 | rs10792821 | 21.0 |
| rs475639      | 48.0 | rs669336   | 18.8 | rs677909     | 31.6 | rs642949   | 37.5 |
| rs7938033     | 42.7 | rs10792820 | 25.3 | rs11234532   | 10.2 |            |      |
| <b>CR1</b>    |      |            |      | <b>CD2AP</b> |      |            |      |
| rs1571344     | 13.7 | rs2025935  | 31.5 | rs9296559    | 26.9 | rs9473121  | 32.8 |
| rs4310446     | 18.1 | rs11117959 | 19.3 | rs12523687   | 10.0 | rs9395267  | 10.4 |
| rs10127904    | 29.4 | rs650877   | 19.9 | rs1385741    | 39.0 | rs9296562  | 40.1 |
| rs3737002     | 27.5 | rs11118131 | 19.0 | rs6458573    | 32.9 | rs13191654 | 22.4 |
| rs677066      | 21.9 | rs6691117  | 21.8 | rs3818866    | 26.3 | rs9395285  | 26.6 |
| rs3818361     | 19.7 | rs6701713  | 19.7 | rs6936622    | 11.0 | rs1485780  | 26.9 |
| rs12734030    | 17.9 | rs12034383 | 41.0 | rs1485781    | 32.9 | rs9349417  | 26.9 |
| rs1408077     | 19.1 | rs10779339 | 49.7 | rs10948367   | 26.9 |            |      |

Table 4: ADNI data analysis: demographic information of the 328 subjects in the dataset investigating the effects of **PICALM**. For the *categorical* variables: gender, handedness and risk of APOE, the numbers are the frequencies for the corresponding groups. For the *continuous* variables: baseline age, baseline ICV and years of education, and the numbers are the mean (standard deviation) of each variable in each group.

|                         | Healthy Control                           | Alzheimer's Disease                       |
|-------------------------|-------------------------------------------|-------------------------------------------|
| Total                   | 176                                       | 152                                       |
| Male (Female)           | 99 (77)                                   | 84(68)                                    |
| Right (Left) Hand Users | 163 (13)                                  | 142(10)                                   |
| <i>Risk of APOE</i> 3   | 2                                         | 31                                        |
| 2                       | 41                                        | 68                                        |
| 1                       | 111                                       | 49                                        |
| 0                       | 22                                        | 4                                         |
| Baseline Age            | 76.1 (5.1)                                | 75.5 (7.6)                                |
| Baseline ICV            | $1.28 \times 10^6$ ( $1.24 \times 10^5$ ) | $1.27 \times 10^6$ ( $1.45 \times 10^5$ ) |
| Years of Education      | 16.3 (2.7)                                | 14.9 (3.2)                                |

Table 5: ADNI data analysis: demographic information of the 299 subjects in the dataset investigating the effects of **CD2AP**. For the *categorical* variables: gender, handedness and risk of APOE, the numbers are the frequencies for the corresponding groups. For the *continuous* variables: baseline age, baseline ICV and years of education, and the numbers are the mean (standard deviation) of each variable in each group.

|                         | Healthy Control                           | Alzheimer's Disease                       |
|-------------------------|-------------------------------------------|-------------------------------------------|
| Total                   | 155                                       | 144                                       |
| Male (Female)           | 84 (71)                                   | 77(67)                                    |
| Right (Left) Hand Users | 143 (12)                                  | 135(9)                                    |
| <i>Risk of APOE</i> 3   | 3                                         | 38                                        |
| 2                       | 37                                        | 64                                        |
| 1                       | 97                                        | 49                                        |
| 0                       | 18                                        | 3                                         |
| Baseline Age            | 76.1 (5.2)                                | 75.1 (7.5)                                |
| Baseline ICV            | $1.27 \times 10^6$ ( $1.25 \times 10^5$ ) | $1.27 \times 10^6$ ( $1.46 \times 10^5$ ) |
| Years of Education      | 16.1 (2.8)                                | 14.7 (3.1)                                |

Table 6: ADNI data analysis: the detailed significant brain regions affected by **CD2AP** using FMEM. The regions with the \* means the regions are detected by FMEM and voxel-based method; the regions with the \*\* means only detected by voxel-based method; the regions with # means only detected by FMEM with healthy control only; the regions with ## means detected by FMEM with AD only; • means not applicable.

| Brain Region                                         | Number of Voxels (right) | Number of Voxels (left) |
|------------------------------------------------------|--------------------------|-------------------------|
| Superior temporal gyrus                              | 167                      | •                       |
| Inferior temporal gyrus                              | *369                     | 378                     |
| Precentral gyrus                                     | *170                     | 439                     |
| Middle frontal gyrus                                 | 127                      | *295                    |
| Postcentral gyrus                                    | 60#                      | 183                     |
| Insula                                               | 53                       | 74                      |
| Putamen                                              | *200#                    | 123#                    |
| Fusiform                                             | 117##                    | 306                     |
| Inferior parietal but supramarginal and angular gyri | 87                       | •                       |
| Angular                                              | 433                      | •                       |
| Inferior frontal gyrus - triangular part             | *180                     | *79                     |
| Inferior occipital gyrus                             | 269                      | •                       |
| Superior frontal gyrus                               | 71                       | •                       |
| Supplementary Motor Area                             | 117#                     | •                       |
| Postcentral gyrus                                    | *104                     | *183                    |
| Superior frontal gyrus and medial                    | 188                      | 159                     |
| Anterior cingulate and paracingulate gyri            | 428                      | 88                      |
| Median cingulate and paracingulate gyri              | 149                      | *116##                  |
| Calcarine fissure and surrounding cortex             | 53                       | 266                     |
| Cuneus                                               | 151#                     | 345                     |
| Superior occipital gyrus                             | •                        | 317                     |
| Middle occipital gyrus                               | •                        | *144                    |
| Precuneus                                            | 61                       | •                       |
| Paracentral Lobule                                   | 86                       | •                       |
| Pallidum                                             | •                        | 58                      |
| Caudate                                              | •                        | 197                     |
| Lingual                                              | •                        | *114##                  |
| Inferior frontal gyrus - opercular part              | •                        | *78                     |
| Inferior occipital gyrus                             | •                        | 133                     |
| Middle temporal gyrus                                | •                        | 394                     |
| Inferior frontal gyrus - orbital part                | •                        | 61                      |
| Temporal pole: superior temporal gyrus               | **74                     | •                       |
| Temporal pole: middle temporal gyrus                 | **61                     | •                       |
| ParaHippocampal gyrus                                | •                        | •                       |
| Inferior parietal but supramarginal and angular gyri | •                        | •                       |

Table 7: ADNI data analysis: the detailed significant brain regions affected by **CR1** using FMEM. The regions with the \* means the regions are detected by FMEM and voxel-based method; the regions with the \*\* means only detected by voxel-based method; the regions with # means only detected by FMEM with healthy control only; the regions with ## means detected by FMEM with AD only; • means not applicable.

| Brain Region                                         | Number of Voxels (right) | Number of Voxels (left) |
|------------------------------------------------------|--------------------------|-------------------------|
| Superior temporal gyrus                              | 167                      | •                       |
| Inferior temporal gyrus                              | 150#                     | 378#.#                  |
| Precentral gyrus                                     | 170##                    | *439##                  |
| Middle frontal gyrus                                 | 127#.#                   | 295#.#                  |
| Postcentral gyrus                                    | 60                       | **65                    |
| Insula                                               | 53                       | 74#                     |
| Putamen                                              | 200                      | *123                    |
| Fusiform                                             | 117#                     | 306#                    |
| Inferior temporal gyrus                              | 219                      | •                       |
| Inferior parietal but supramarginal and angular gyri | 87                       | •                       |
| Angular                                              | 433                      | •                       |
| Inferior frontal gyrus, triangular part              | 180#                     | *79                     |
| Inferior occipital gyrus                             | 269                      | 133                     |
| Superior frontal gyrus                               | 71#                      | •                       |
| Supplementary Motor Area                             | 117                      | •                       |
| Postcentral gyrus                                    | 104#                     | 183                     |
| Superior frontal gyrus, medial                       | 188#                     | 159                     |
| Anterior cingulate and paracingulate gyri            | 428                      | 88                      |
| Median cingulate and paracingulate gyri              | 209                      | 116                     |
| Calcarine fissure and surrounding cortex             | 53#                      | 266##                   |
| Cuneus                                               | 151                      | 345##                   |
| Superior occipital gyrus                             | •                        | 317##                   |
| Middle occipital gyrus                               | 144                      | •                       |
| Precuneus                                            | 61                       | •                       |
| Paracentral Lobule                                   | 86##                     | •                       |
| Pallidum                                             | 58                       | •                       |
| Caudate                                              | •                        | 197                     |
| Lingual                                              | •                        | 114##                   |
| Inferior frontal gyrus, opercular part               | •                        | 78                      |
| Middle temporal gyrus                                | •                        | *394#.#                 |
| Inferior frontal gyrus, orbital part                 | •                        | 61                      |
| Hippocampus                                          | •                        | •                       |
| Olfactory cortex                                     | •                        | •                       |
| Gyrus rectus                                         | •                        | •                       |
| Rolandic Operculum                                   | 76#                      | •                       |
| Temporal pole: superior temporal gyrus               | •                        | •                       |

Table 8: ADNI data analysis: the detailed significant brain regions affected by **PICALM** using FMEM. The regions with the \* means the regions are detected by FMEM and voxel-based method; the regions with the \*\* means only detected by voxel-based method; the regions with # means only detected by FMEM with healthy control only; the regions with ## means detected by FMEM with AD only; • means not applicable.

| Brain Region                                         | Number of Voxels (right) | Number of Voxels (left) |
|------------------------------------------------------|--------------------------|-------------------------|
| Inferior frontal gyrus - triangular part             | 206                      | •                       |
| Inferior frontal gyrus - orbital part                | 213                      | •                       |
| Insula                                               | 363                      | •                       |
| Hippocampus                                          | 72                       | •                       |
| ParaHippocampal gyrus                                | 72                       | **60                    |
| Amygdala                                             | 68                       | •                       |
| Fusiform                                             | 205                      | •                       |
| Putamen                                              | 144                      | •                       |
| Superior temporal gyrus                              | 790                      | •                       |
| Temporal pole: superior temporal gyrus               | 472                      | •                       |
| Middle temporal gyrus                                | 441                      | •                       |
| Temporal pole: middle temporal gyrus                 | 127                      | •                       |
| Inferior temporal gyrus                              | 402                      | •                       |
| Precentral gyrus                                     | 519                      | •                       |
| Middle frontal gyrus                                 | 588                      | •                       |
| Postcentral gyrus                                    | 404#                     | •                       |
| SupraMarginal gyrus                                  | 350                      | •                       |
| Superior occipital gyrus                             | 72                       | •                       |
| Middle occipital gyrus                               | 834                      | •                       |
| Inferior parietal but supramarginal and angular gyri | 239#                     | •                       |
| Angular                                              | 491                      | •                       |
| Rolandic Operculum                                   | 76                       | •                       |
| Inferior frontal gyrus - opercular part              | 112                      | •                       |
| Superior frontal gyrus - orbital part                | 75                       | •                       |
| Middle frontal gyrus                                 | 375                      | •                       |
| Middle frontal gyrus - orbital part                  | 338                      | •                       |
| Superior frontal gyrus                               | 66                       | •                       |
| Median cingulate and paracingulate gyri              | •                        | **51                    |

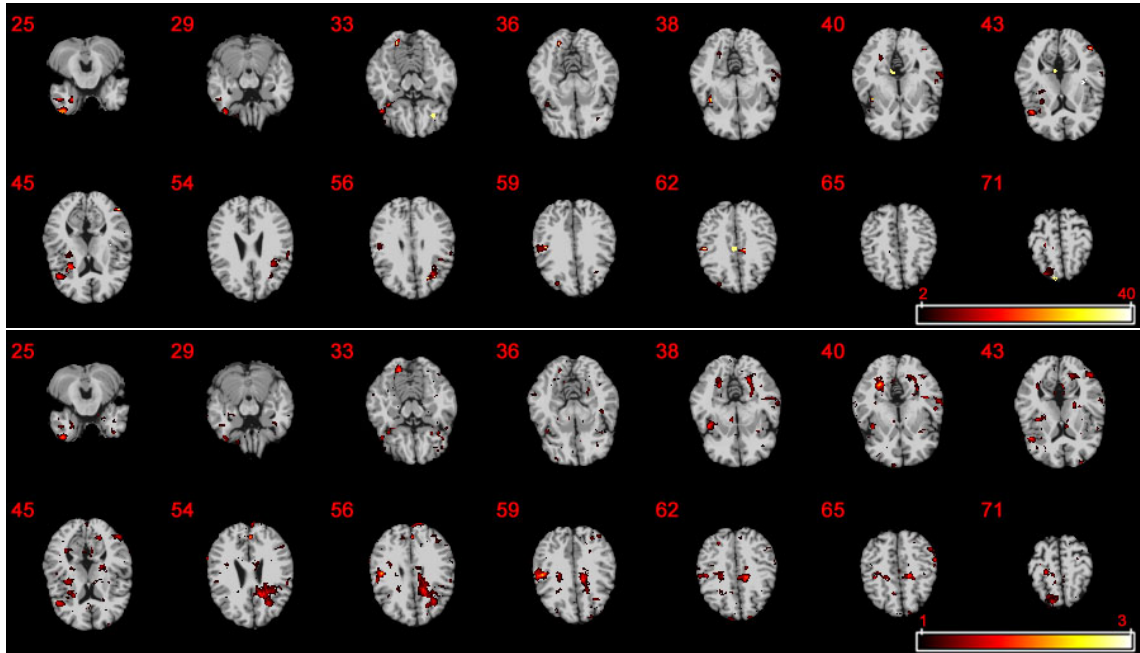

Figure 1: ADNI data analysis based on the combined HC and AD samples: the  $-\log_{10}(p)$  maps for testing the genetic effect of **CD2AP** on RAVEN images by using FMEM from 14 selected slices. The first and second rows are obtained from FMEM, while the third and fourth rows are obtained from Ge's method. The colorbar of  $-\log_{10}(p)$  ranges from 2 to 40 for FMEM and from 1 to 3 for Ge's method, respectively.

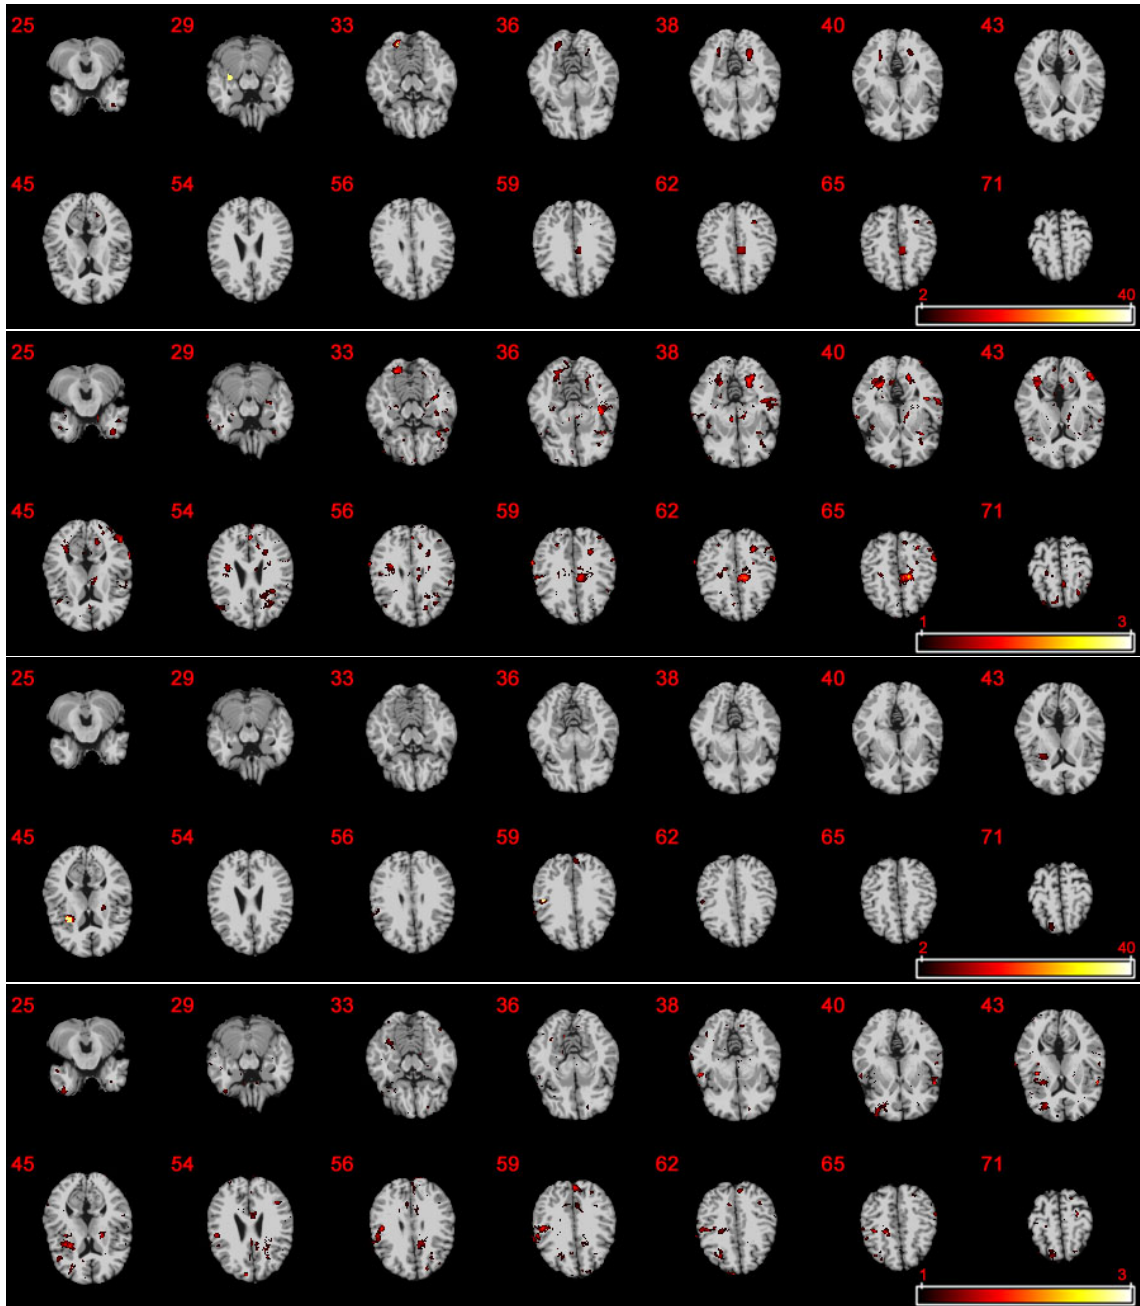

Figure 2: ADNI data analysis based on either AD samples (the first four rows) or HC samples (the last four rows): the  $-\log_{10}(p)$  maps for testing the genetic effect of **CD2AP** on RAVEN images by using FMEM from 14 selected slices. The first, second, fifth, and sixth rows are obtained from FMEM, while the third, fourth, seventh, and eighth rows are obtained from Ge's method. The colorbar of  $-\log_{10}(p)$  ranges from 2 to 40 for FMEM and from 1 to 3 for Ge's method, respectively. 15



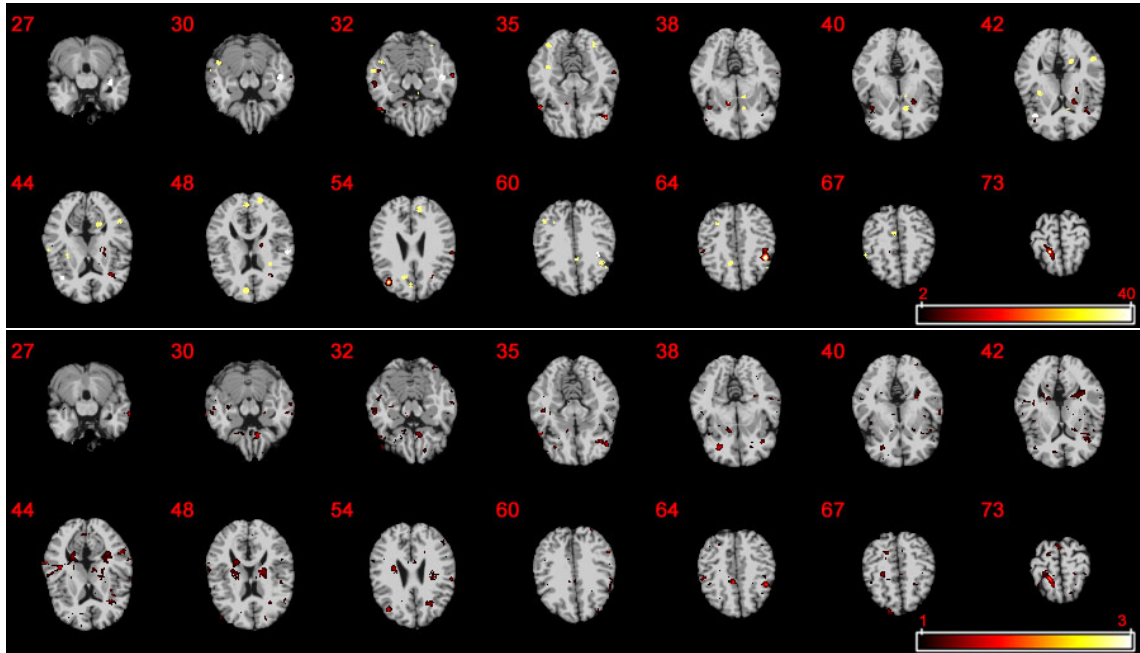

Figure 3: ADNI data analysis based on the combined HC and AD samples: the  $-\log_{10}(p)$  maps for testing the genetic effect of **CR1** on RAVEN images by using FMEM from 14 selected slices. The first and second rows are obtained from FMEM, while the third and fourth rows are obtained from Ge's method. The colorbar of  $-\log_{10}(p)$  ranges from 2 to 40 for FMEM and from 1 to 3 for Ge's method, respectively.

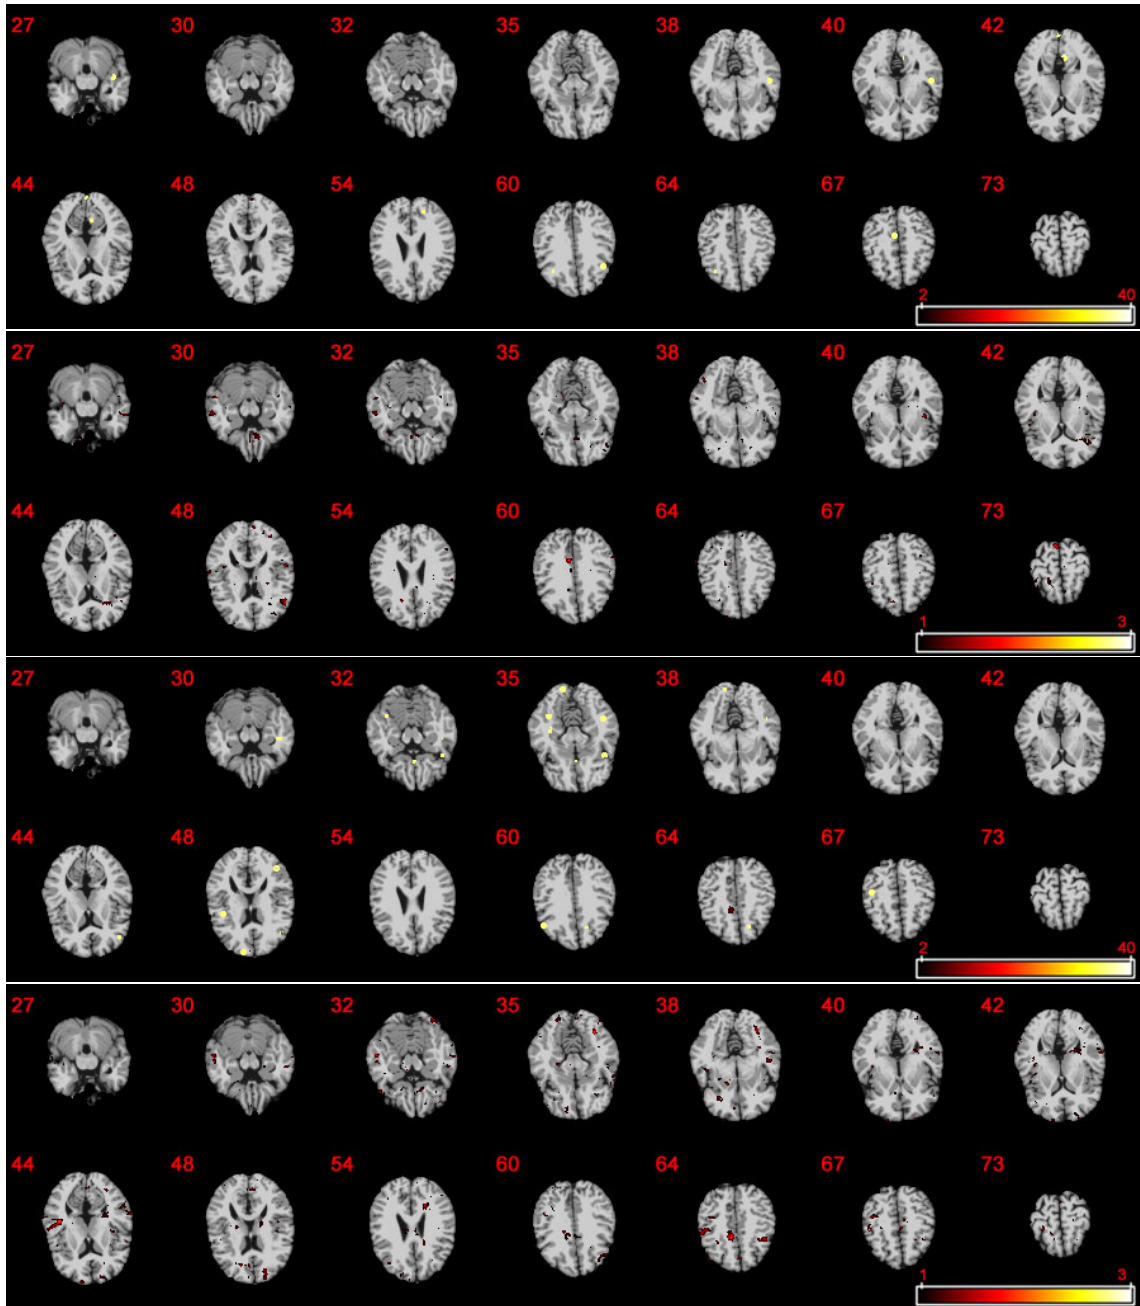

Figure 4: ADNI data analysis based on either AD samples (the first four rows) or HC samples (the last four rows): the  $-\log_{10}(p)$  maps for testing the genetic effect of **CR1** on RAVEN images by using FMEM from 14 selected slices. The first, second, fifth, and sixth rows are obtained from FMEM, while the third, fourth, seventh, and eighth rows are obtained from Ge's method. The colorbar of  $-\log_{10}(p)$  ranges from 2 to 40 for FMEM and from 1 to 3 for Ge's method, respectively. 17

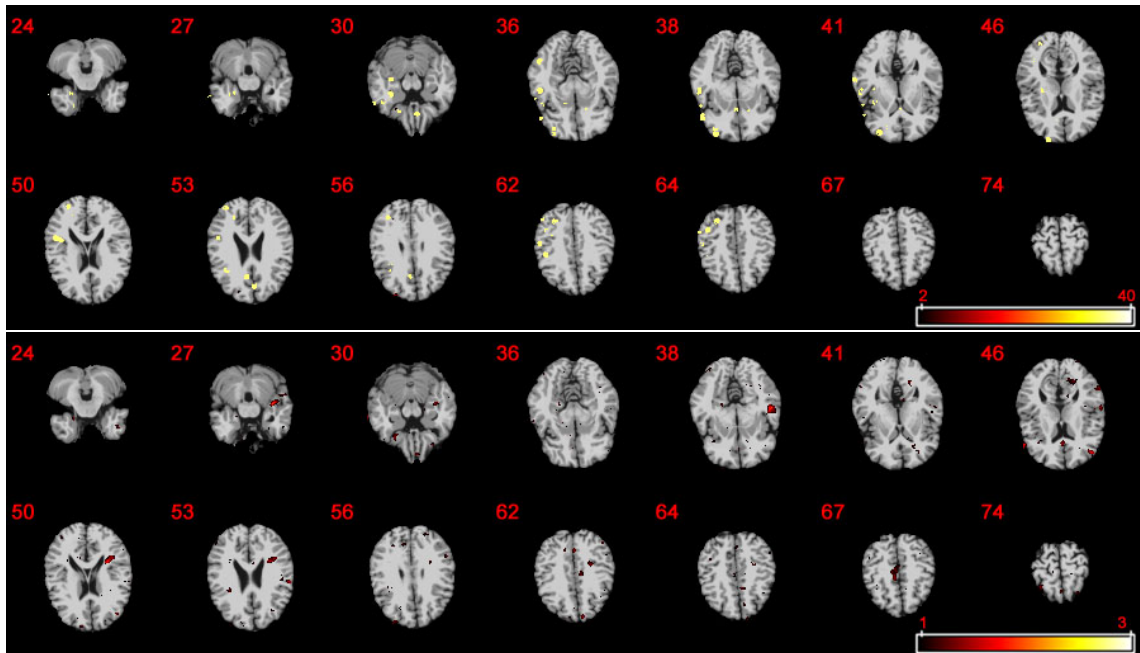

Figure 5: ADNI data analysis based on the combined HC and AD samples: the  $-\log_{10}(p)$  maps for testing the genetic effect of **PICALM** on RAVEN images by using FMEM from 14 selected slices. The first and second rows are obtained from FMEM, while the third and fourth rows are obtained from Ge's method. The colorbar of  $-\log_{10}(p)$  ranges from 2 to 40 for FMEM and from 1 to 3 for Ge's method, respectively.

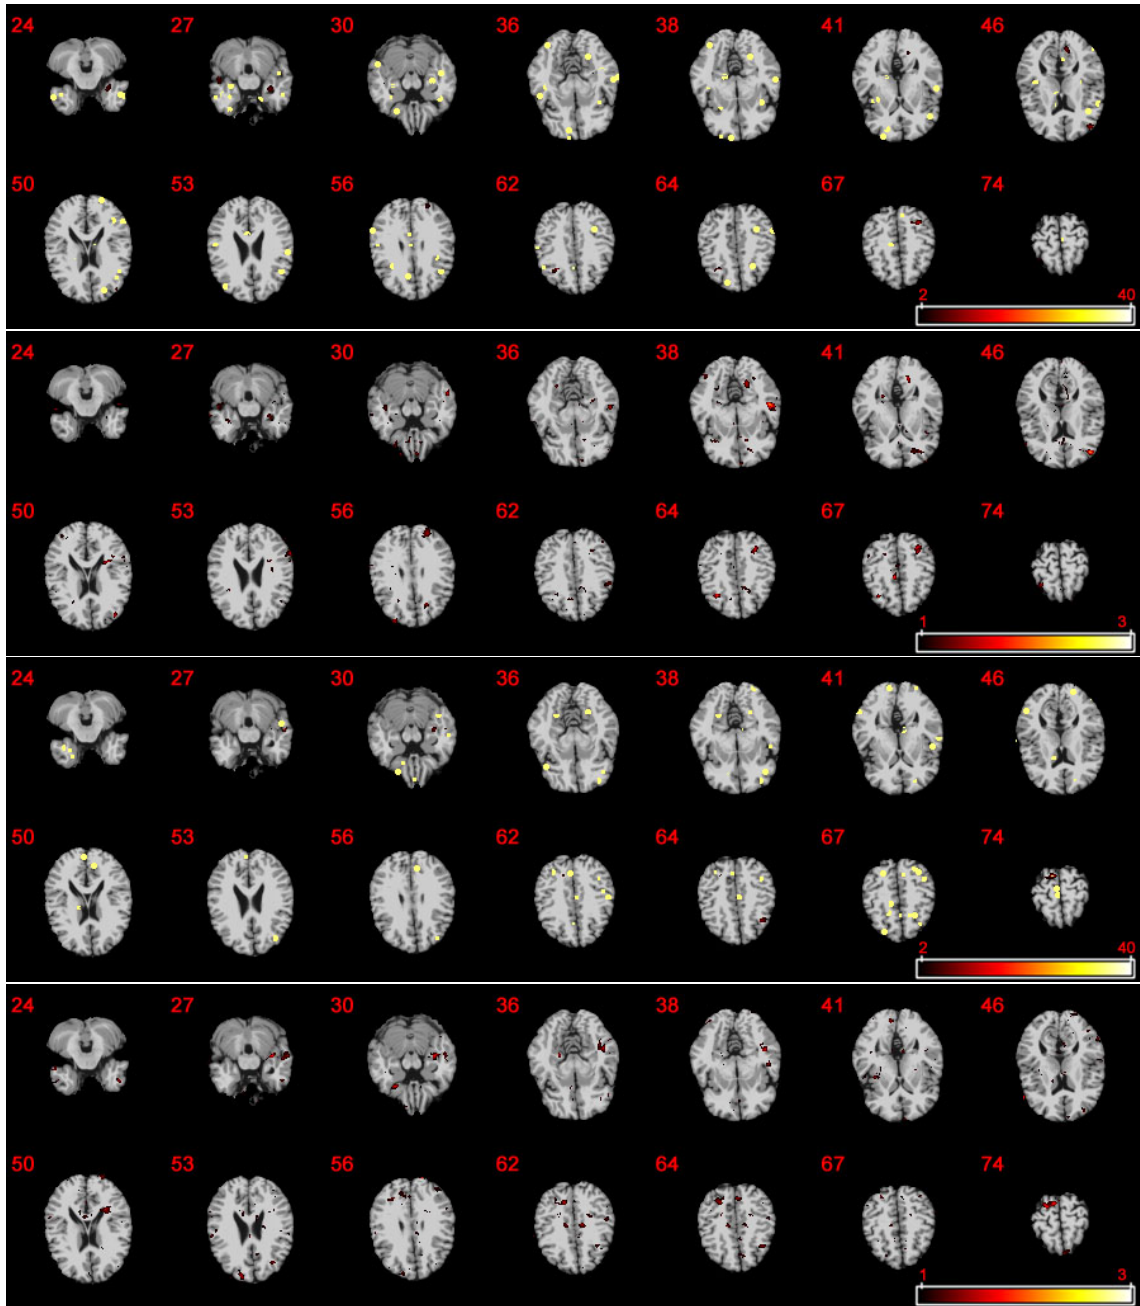

Figure 6: ADNI data analysis based on either AD samples (the first four rows) or HC samples (the last four rows): the  $-\log_{10}(p)$  maps for testing the genetic effect of **PICALM** on RAVEN images by using FMEM from 14 selected slices. The first, second, fifth, and sixth rows are obtained from FMEM, while the third, fourth, seventh, and eighth rows are obtained from Ge's method. The colorbar of  $-\log_{10}(p)$  ranges from 2 to 40 for FMEM and from 1 to 3 for Ge's method, respectively. 19
